# Supplementary material
Source: Royal Society of Chemistry journal article supplement (doi:10.1039/d6cp00606j)

**Supporting Information for:**

**Rotational Spectrum of Laser-Ablated Mannitol: A Conformational and Photofragmentation Study**

S. Mato,<sup>a</sup> E. R.Alonso,<sup>a</sup> E. Martínez-Núñez,<sup>b</sup> A. Fernández-Ramos,<sup>bc</sup> I.León,<sup>a</sup> S.Mata,<sup>a</sup> J. L. Alonso<sup>\*a</sup>

---

<sup>a</sup> Grupo de Espectroscopia Molecular (GEM), Edificio Quifima, Laboratorios de Espectroscopia y Bioespectroscopia, Parque Científico UVa, Universidad de Valladolid, 47011, Valladolid, Spain.

<sup>b</sup> Departamento de Química Física, Facultad de Química, Universidade de Santiago de Compostela, Avda. das Ciencias s/n 15782, Santiago de Compostela, España

<sup>c</sup> Centro Singular de Investigación en Química Biológica y Materiales Moleculares (CIQUS), Universidade de Santiago de Compostela, C/Jenaro de la Fuente s/n, Santiago de Compostela, España

**Figure S01:** LA-CP-FTMW spectrum of mannitol: (a) 2-8 GHz and (b) 6-12 GHz.

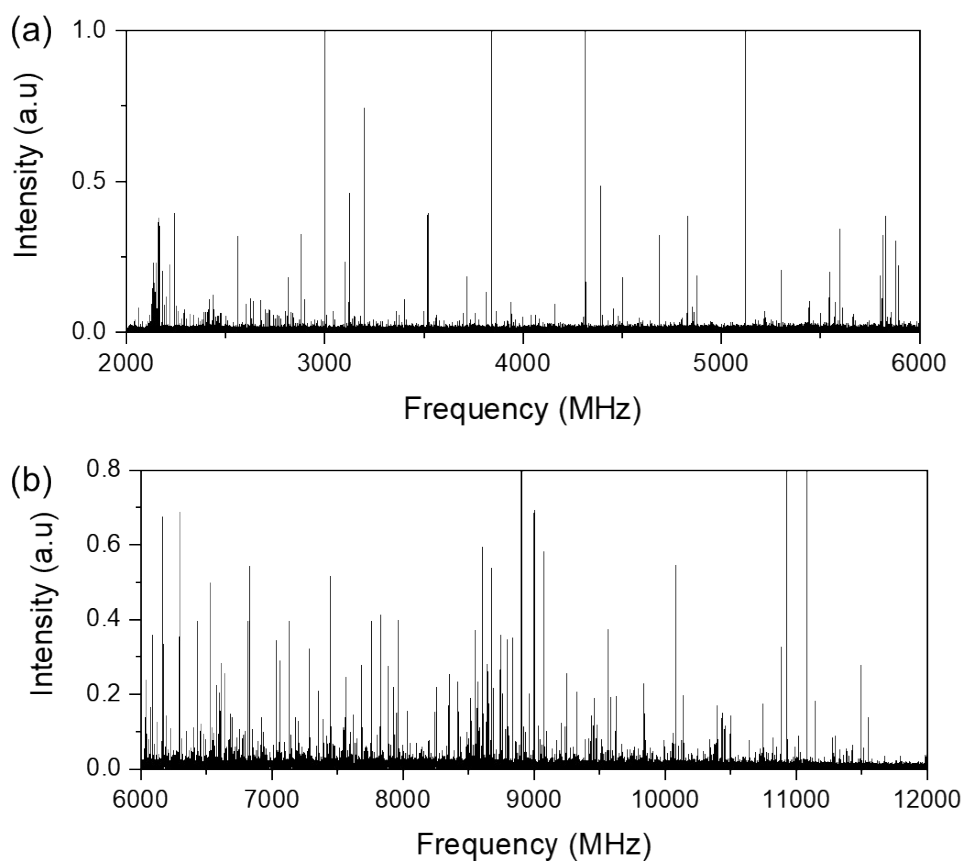

**Table S01.** Predicted parameters for mannitol conformers at different computational methodologies.

| TG+T/G+G+c        | B3LYP-GD3BJ | MP2  | B2PLYPD | TG+T/G+T/c        | B3LYP-GD3BJ | MP2  | B2PLYPD |
|-------------------|-------------|------|---------|-------------------|-------------|------|---------|
| A                 | 1662        | 1679 | 1672    | A                 | 1668        | 1669 | 1670    |
| B                 | 537         | 547  | 541     | B                 | 517         | 524  | 519     |
| C                 | 444         | 452  | 447     | C                 | 418         | 424  | 420     |
| $\mu_a$           | -0.3        | 0.1  | 0.2     | $\mu_a$           | 2.5         | 2.6  | 2.6     |
| $\mu_b$           | -0.4        | 0.4  | 0.4     | $\mu_b$           | 0.2         | -0.2 | -0.2    |
| $\mu_c$           | 0.3         | 0.3  | 0.3     | $\mu_c$           | -0.9        | 0.9  | 0.9     |
| $\Delta E$        | 16          | 0    | 0       | $\Delta E$        | 182         | 160  | 127     |
| $\Delta E_{ZPE}$  | 0           | 0    | 0       | $\Delta E_{ZPE}$  | 119         | 118  | 85      |
| $\Delta G_{298K}$ | 0           | 0    | 0       | $\Delta G_{298K}$ | 244         | 143  | 177     |

  

| TG-T/TT/c        | B3LYP-GD3BJ | MP2  | B2PLYPD | TG+T/G+T/c'      | B3LYP-GD3BJ | MP2  | B2PLYPD |
|------------------|-------------|------|---------|------------------|-------------|------|---------|
| A                | 1491        | 1477 | 1488    | A                | 1670        | 1670 | 1672    |
| B                | 489         | 496  | 492     | B                | 514         | 521  | 516     |
| C                | 475         | 486  | 479     | C                | 416         | 422  | 418     |
| $\mu_a$          | 0.0         | 0.0  | 0.0     | $\mu_a$          | 1.4         | 1.4  | 1.4     |
| $\mu_b$          | 0.0         | 0.0  | 0.0     | $\mu_b$          | 0.3         | -0.3 | -0.3    |
| $\mu_c$          | -1.4        | -1.4 | -1.4    | $\mu_c$          | 0.9         | -0.9 | -0.9    |
| $\Delta E$       | 575         | 640  | 561     | $\Delta E$       | 199         | 290  | 191     |
| $\Delta E_{ZPE}$ | 330         | 367  | 315     | $\Delta E_{ZPE}$ | 163         | 239  | 161     |

| $\Delta G_{298K}$ | 356         | 291  | 309     | $\Delta G_{298K}$ | 299         | 252  | 257     |
|-------------------|-------------|------|---------|-------------------|-------------|------|---------|
| TG-T/TT/c'        | B3LYP-GD3BJ | MP2  | B2PLYPD | TG+T/G+G+/c       | B3LYP-GD3BJ | MP2  | B2PLYPD |
| A                 | 1499        | 1483 | 1495    | A                 | 1618        | 1637 | 1626    |
| B                 | 486         | 494  | 489     | B                 | 542         | 549  | 545     |
| C                 | 472         | 484  | 476     | C                 | 448         | 454  | 450     |
| $\mu_a$           | 1.7         | 1.8  | 1.8     | $\mu_a$           | -2.8        | 2.8  | 2.8     |
| $\mu_b$           | -0.7        | -0.7 | -0.7    | $\mu_b$           | 0.5         | -0.6 | -0.5    |
| $\mu_c$           | -2.4        | -2.4 | -2.4    | $\mu_c$           | 0.4         | 0.4  | 0.4     |
| $\Delta E$        | 609         | 767  | 636     | $\Delta E$        | 295         | 306  | 266     |
| $\Delta E_{ZPE}$  | 400         | 524  | 422     | $\Delta E_{ZPE}$  | 265         | 281  | 250     |
| $\Delta G_{298K}$ | 447         | 466  | 433     | $\Delta G_{298K}$ | 395         | 288  | 343     |
| TTG-/G-T/c        | B3LYP-GD3BJ | MP2  | B2PLYPD | TG-T/TG+/c        | B3LYP-GD3BJ | MP2  | B2PLYPD |
| A                 | 1484        | 1486 | 1487    | A                 | 1701        | 1690 | 1699    |
| B                 | 524         | 529  | 526     | B                 | 496         | 504  | 499     |
| C                 | 458         | 465  | 461     | C                 | 459         | 470  | 463     |
| $\mu_a$           | 3.9         | 3.9  | 3.9     | $\mu_a$           | 2.1         | 2.2  | 2.1     |
| $\mu_b$           | -1.9        | -2.0 | -1.9    | $\mu_b$           | -0.7        | -0.8 | -0.7    |
| $\mu_c$           | -0.2        | -0.2 | -0.2    | $\mu_c$           | -0.3        | -0.3 | -0.3    |
| $\Delta E$        | 406         | 445  | 406     | $\Delta E$        | 508         | 778  | 599     |
| $\Delta E_{ZPE}$  | 363         | 427  | 385     | $\Delta E_{ZPE}$  | 371         | 580  | 450     |
| $\Delta G_{298K}$ | 518         | 498  | 517     | $\Delta G_{298K}$ | 409         | 464  | 339     |
| G-TG-/TT/c        | B3LYP-GD3BJ | MP2  | B2PLYPD | TG-T/TT/c''       | B3LYP-GD3BJ | MP2  | B2PLYPD |
| A                 | 1775        | 1780 | 1778    | A                 | 1509        | 1491 | 1504    |
| B                 | 463         | 468  | 465     | B                 | 484         | 491  | 486     |
| C                 | 437         | 442  | 439     | C                 | 469         | 481  | 474     |
| $\mu_a$           | 0.0         | 0.0  | 0.0     | $\mu_a$           | 0.0         | 0.0  | 0.0     |
| $\mu_b$           | 1.0         | 1.0  | -1.0    | $\mu_b$           | 0.0         | 0.0  | 0.0     |
| $\mu_c$           | 0.0         | 0.0  | 0.0     | $\mu_c$           | -3.4        | -3.4 | -3.4    |
| $\Delta E$        | 196         | 431  | 316     | $\Delta E$        | 661         | 915  | 729     |
| $\Delta E_{ZPE}$  | 163         | 395  | 291     | $\Delta E_{ZPE}$  | 487         | 696  | 545     |
| $\Delta G_{298K}$ | 360         | 478  | 449     | $\Delta G_{298K}$ | 552         | 652  | 573     |
| G-TG-/G+T/c       | B3LYP-GD3BJ | MP2  | B2PLYPD | TG-T/G+T/c        | B3LYP-GD3BJ | MP2  | B2PLYPD |
| A                 | 1565        | 1588 | 1573    | A                 | 1701        | 1689 | 1698    |
| B                 | 529         | 533  | 530     | B                 | 499         | 508  | 503     |
| C                 | 497         | 504  | 499     | C                 | 462         | 474  | 467     |
| $\mu_a$           | -2.0        | -2.0 | 2.0     | $\mu_a$           | -0.2        | -0.2 | -0.2    |
| $\mu_b$           | 0.9         | 0.7  | -0.8    | $\mu_b$           | 0.5         | 0.5  | 0.5     |
| $\mu_c$           | -0.7        | -0.7 | -0.7    | $\mu_c$           | -1.6        | -1.8 | -1.7    |
| $\Delta E$        | 303         | 539  | 418     | $\Delta E$        | 724         | 866  | 757     |
| $\Delta E_{ZPE}$  | 246         | 442  | 356     | $\Delta E_{ZPE}$  | 561         | 671  | 590     |
| $\Delta G_{298K}$ | 456         | 518  | 519     | $\Delta G_{298K}$ | 633         | 632  | 625     |
| TTG+/TG-/cc       | B3LYP-GD3BJ | MP2  | B2PLYPD | G-TG-/G+G+/c      | B3LYP-GD3BJ | MP2  | B2PLYPD |

| A                 | 1626        | 1634 | 1630    | A                 | 1417        | 1445 | 1427    |
|-------------------|-------------|------|---------|-------------------|-------------|------|---------|
| B                 | 498         | 504  | 500     | B                 | 593         | 595  | 594     |
| C                 | 437         | 442  | 439     | C                 | 581         | 588  | 583     |
| $\mu_a$           | 0.5         | -0.4 | -0.5    | $\mu_a$           | 0.0         | 0.0  | 0.0     |
| $\mu_b$           | -0.1        | 0.2  | 0.1     | $\mu_b$           | 0.2         | 0.1  | -0.1    |
| $\mu_c$           | 0.3         | 0.3  | 0.3     | $\mu_c$           | 0.0         | 0.0  | 0.0     |
| $\Delta E$        | 877         | 1054 | 908     | $\Delta E$        | 393         | 671  | 517     |
| $\Delta E_{ZPE}$  | 664         | 811  | 693     | $\Delta E_{ZPE}$  | 336         | 528  | 439     |
| $\Delta G_{298K}$ | 763         | 773  | 744     | $\Delta G_{298K}$ | 576         | 630  | 631     |
| G+G+T/TG+/c       | B3LYP-GD3BJ | MP2  | B2PLYPD | G-TG-/G-T/c       | B3LYP-GD3BJ | MP2  | B2PLYPD |
| A                 | 1427        | 1423 | 1426    | A                 | 1407        | 1412 | 1409    |
| B                 | 551         | 562  | 555     | B                 | 564         | 573  | 567     |
| C                 | 453         | 461  | 456     | C                 | 488         | 495  | 490     |
| $\mu_a$           | -0.3        | 0.1  | 0.2     | $\mu_a$           | -2.4        | 2.5  | 2.5     |
| $\mu_b$           | -0.3        | -0.2 | -0.3    | $\mu_b$           | -0.5        | 0.6  | 0.6     |
| $\mu_c$           | -0.4        | 0.4  | 0.4     | $\mu_c$           | 0.8         | 0.9  | 0.8     |
| $\Delta E$        | 838         | 786  | 808     | $\Delta E$        | 573         | 640  | 619     |
| $\Delta E_{ZPE}$  | 700         | 659  | 677     | $\Delta E_{ZPE}$  | 511         | 573  | 564     |
| $\Delta G_{298K}$ | 723         | 635  | 681     | $\Delta G_{298K}$ | 675         | 642  | 695     |
| G+TG-/TT/cc       | B3LYP-GD3BJ | MP2  | B2PLYPD | TG+T/TG-/c        | B3LYP-GD3BJ | MP2  | B2PLYPD |
| A                 | 1933        | 1944 | 1940    | A                 | 1731        | 1735 | 1735    |
| B                 | 457         | 461  | 458     | B                 | 501         | 507  | 503     |
| C                 | 419         | 423  | 420     | C                 | 403         | 409  | 405     |
| $\mu_a$           | 3.2         | 3.1  | 3.2     | $\mu_a$           | -0.1        | 0.1  | 0.1     |
| $\mu_b$           | -0.4        | 0.4  | 0.4     | $\mu_b$           | 0.1         | -0.1 | -0.1    |
| $\mu_c$           | -0.6        | 0.6  | 0.6     | $\mu_c$           | -0.3        | -0.3 | -0.2    |
| $\Delta E$        | 688         | 857  | 736     | $\Delta E$        | 869         | 1117 | 902     |
| $\Delta E_{ZPE}$  | 591         | 786  | 661     | $\Delta E_{ZPE}$  | 693         | 956  | 744     |
| $\Delta G_{298K}$ | 727         | 827  | 769     | $\Delta G_{298K}$ | 721         | 884  | 746     |
| TG+T/G-T/c        | B3LYP-GD3BJ | MP2  | B2PLYPD | G+G+T/G-G+/c      | B3LYP-GD3BJ | MP2  | B2PLYPD |
| A                 | 1731        | 1731 | 1733    | A                 | 1381        | 1394 | 1387    |
| B                 | 499         | 505  | 501     | B                 | 610         | 616  | 612     |
| C                 | 403         | 408  | 405     | C                 | 502         | 514  | 505     |
| $\mu_a$           | -1.2        | 1.3  | 1.2     | $\mu_a$           | -0.6        | -0.8 | 0.6     |
| $\mu_b$           | 0.2         | -0.3 | -0.3    | $\mu_b$           | -1.2        | 1.4  | -1.2    |
| $\mu_c$           | 1.9         | 2.1  | 1.9     | $\mu_c$           | 1.8         | -1.7 | -1.8    |
| $\Delta E$        | 760         | 1097 | 833     | $\Delta E$        | 636         | 761  | 679     |
| $\Delta E_{ZPE}$  | 635         | 960  | 714     | $\Delta E_{ZPE}$  | 585         | 709  | 639     |
| $\Delta G_{298K}$ | 769         | 948  | 798     | $\Delta G_{298K}$ | 768         | 772  | 751     |
| G-TG-/G+T/c       | B3LYP-GD3BJ | MP2  | B2PLYPD | G-TG-/TT/cc       | B3LYP-GD3BJ | MP2  | B2PLYPD |
| A                 | 1699        | 1656 | 1683    | A                 | 1810        | 1824 | 1819    |
| B                 | 514         | 525  | 518     | B                 | 462         | 467  | 463     |

| C                 | 493         | 505  | 498     | C                 | 441         | 447  | 443     |
|-------------------|-------------|------|---------|-------------------|-------------|------|---------|
| $\mu_a$           | -1.3        | -1.7 | 1.5     | $\mu_a$           | 0.0         | 0.0  | 0.0     |
| $\mu_b$           | -0.3        | -0.4 | 0.4     | $\mu_b$           | 0.5         | 0.5  | 0.5     |
| $\mu_c$           | -0.8        | -0.5 | -0.7    | $\mu_c$           | 0.0         | 0.0  | 0.0     |
| $\Delta E$        | 417         | 619  | 542     | $\Delta E$        | 128         | 488  | 309     |
| $\Delta E_{ZPE}$  | 420         | 516  | 515     | $\Delta E_{ZPE}$  | 200         | 572  | 398     |
| $\Delta G_{298K}$ | 657         | 511  | 680     | $\Delta G_{298K}$ | 449         | 731  | 619     |
| G-TG-/G-T/cc      | B3LYP-GD3BJ | MP2  | B2PLYPD | G-TG+/TG-/cc      | B3LYP-GD3BJ | MP2  | B2PLYPD |
| A                 | 1422        | 1434 | 1429    | A                 | 1501        | 1501 | 1503    |
| B                 | 564         | 571  | 566     | B                 | 518         | 524  | 520     |
| C                 | 493         | 501  | 496     | C                 | 477         | 483  | 479     |
| $\mu_a$           | -2.7        | 2.7  | 2.8     | $\mu_a$           | 5.0         | -4.9 | -4.9    |
| $\mu_b$           | -0.9        | 0.9  | 0.9     | $\mu_b$           | 1.6         | -1.5 | -1.6    |
| $\mu_c$           | 1.0         | 1.0  | 1.0     | $\mu_c$           | -0.5        | -0.5 | -0.5    |
| $\Delta E$        | 269         | 453  | 369     | $\Delta E$        | 594         | 904  | 704     |
| $\Delta E_{ZPE}$  | 319         | 522  | 437     | $\Delta E_{ZPE}$  | 571         | 822  | 674     |
| $\Delta G_{298K}$ | 543         | 672  | 640     | $\Delta G_{298K}$ | 798         | 918  | 859     |
| G+TG-/G-T/cc      | B3LYP-GD3BJ | MP2  | B2PLYPD | G+G+G-/G+G+/c     | B3LYP-GD3BJ | MP2  | B2PLYPD |
| A                 | 1582        | 1589 | 1587    | A                 | 1313        | 1329 | 1319    |
| B                 | 528         | 533  | 530     | B                 | 682         | 688  | 684     |
| C                 | 459         | 464  | 461     | C                 | 507         | 513  | 509     |
| $\mu_a$           | -1.7        | -1.7 | 1.7     | $\mu_a$           | -0.8        | 0.8  | 0.8     |
| $\mu_b$           | 2.3         | 2.3  | -2.3    | $\mu_b$           | -0.5        | -0.6 | -0.5    |
| $\mu_c$           | 0.5         | 0.5  | 0.5     | $\mu_c$           | -1.3        | 1.4  | 1.4     |
| $\Delta E$        | 450         | 837  | 604     | $\Delta E$        | 0           | 404  | 170     |
| $\Delta E_{ZPE}$  | 456         | 826  | 618     | $\Delta E_{ZPE}$  | 220         | 593  | 392     |
| $\Delta G_{298K}$ | 704         | 949  | 827     | $\Delta G_{298K}$ | 618         | 795  | 725     |
| TG-G-/TG+/c       | B3LYP-GD3BJ | MP2  | B2PLYPD | G+G+T/G+T/c       | B3LYP-GD3BJ | MP2  | B2PLYPD |
| A                 | 1261        | 1254 | 1259    | A                 | 1508        | 1519 | 1512    |
| B                 | 647         | 659  | 651     | B                 | 525         | 532  | 528     |
| C                 | 585         | 593  | 587     | C                 | 464         | 468  | 465     |
| $\mu_a$           | -2.8        | -2.6 | -2.7    | $\mu_a$           | -1.3        | 1.4  | 1.4     |
| $\mu_b$           | -0.3        | -0.4 | -0.4    | $\mu_b$           | 0.4         | -0.4 | -0.4    |
| $\mu_c$           | -0.7        | -0.8 | -0.8    | $\mu_c$           | 1.5         | 1.5  | 1.5     |
| $\Delta E$        | 267         | 765  | 482     | $\Delta E$        | 810         | 931  | 829     |
| $\Delta E_{ZPE}$  | 333         | 737  | 522     | $\Delta E_{ZPE}$  | 686         | 807  | 714     |
| $\Delta G_{298K}$ | 690         | 908  | 817     | $\Delta G_{298K}$ | 797         | 817  | 793     |
| G-TG-/G-T/c       | B3LYP-GD3BJ | MP2  | B2PLYPD | G+TG+/TG-/cc      | B3LYP-GD3BJ | MP2  | B2PLYPD |
| A                 | 1401        | 1407 | 1404    | A                 | 1597        | 1604 | 1601    |
| B                 | 560         | 569  | 563     | B                 | 528         | 536  | 531     |
| C                 | 485         | 493  | 487     | C                 | 443         | 448  | 445     |
| $\mu_a$           | -2.3        | 2.3  | -2.3    | $\mu_a$           | 4.4         | -4.3 | -4.3    |

| $\mu_b$           | 0.2         | -0.2 | -0.2    | $\mu_b$           | 1.2         | -1.1 | -1.2    |
|-------------------|-------------|------|---------|-------------------|-------------|------|---------|
| $\mu_c$           | -1.1        | -1.0 | 1.0     | $\mu_c$           | 1.9         | 1.9  | 1.9     |
| $\Delta E$        | 649         | 840  | 749     | $\Delta E$        | 712         | 961  | 804     |
| $\Delta E_{ZPE}$  | 590         | 755  | 688     | $\Delta E_{ZPE}$  | 679         | 911  | 774     |
| $\Delta G_{298K}$ | 740         | 796  | 797     | $\Delta G_{298K}$ | 923         | 1048 | 982     |
| G+TG-/G-T/c       | B3LYP-GD3BJ | MP2  | B2PLYPD | G+TG+/TG+/cc      | B3LYP-GD3BJ | MP2  | B2PLYPD |
| A                 | 1571        | 1576 | 1574    | A                 | 1701        | 1720 | 1710    |
| B                 | 527         | 532  | 528     | B                 | 515         | 521  | 517     |
| C                 | 458         | 463  | 460     | C                 | 473         | 476  | 474     |
| $\mu_a$           | -2.6        | -2.6 | -2.6    | $\mu_a$           | -3.1        | -3.1 | -3.1    |
| $\mu_b$           | -2.0        | -2.1 | -2.1    | $\mu_b$           | 0.6         | 0.6  | 0.6     |
| $\mu_c$           | 0.5         | 0.4  | 0.5     | $\mu_c$           | 0.2         | 0.2  | 0.2     |
| $\Delta E$        | 689         | 983  | 802     | $\Delta E$        | 612         | 880  | 718     |
| $\Delta E_{ZPE}$  | 633         | 948  | 764     | $\Delta E_{ZPE}$  | 604         | 831  | 707     |
| $\Delta G_{298K}$ | 825         | 1016 | 915     | $\Delta G_{298K}$ | 877         | 1001 | 947     |
| G+TG-/G-G-/cc     | B3LYP-GD3BJ | MP2  | B2PLYPD | G-TG-/G-T/cc      | B3LYP-GD3BJ | MP2  | B2PLYPD |
| A                 | 1302        | 1307 | 1305    | A                 | 1418        | 1431 | 1425    |
| B                 | 600         | 608  | 603     | B                 | 560         | 568  | 563     |
| C                 | 537         | 545  | 540     | C                 | 490         | 499  | 493     |
| $\mu_a$           | -1.1        | 1.1  | 1.1     | $\mu_a$           | -2.6        | 2.7  | -2.7    |
| $\mu_b$           | 3.6         | 3.6  | 3.6     | $\mu_b$           | -0.2        | 0.2  | 0.2     |
| $\mu_c$           | -0.8        | 0.8  | 0.8     | $\mu_c$           | -0.9        | -0.9 | 0.9     |
| $\Delta E$        | 738         | 975  | 821     | $\Delta E$        | 379         | 680  | 528     |
| $\Delta E_{ZPE}$  | 696         | 918  | 788     | $\Delta E_{ZPE}$  | 428         | 719  | 583     |
| $\Delta G_{298K}$ | 908         | 1018 | 966     | $\Delta G_{298K}$ | 633         | 838  | 761     |
| TTG-/TT/c         | B3LYP-GD3BJ | MP2  | B2PLYPD | TG-G-/TG+/c       | B3LYP-GD3BJ | MP2  | B2PLYPD |
| A                 | 1860        | 1858 | 1862    | A                 | 1266        | 1258 | 1264    |
| B                 | 443         | 447  | 444     | B                 | 641         | 653  | 645     |
| C                 | 416         | 422  | 418     | C                 | 579         | 587  | 582     |
| $\mu_a$           | 2.0         | 1.9  | 2.0     | $\mu_a$           | -1.1        | -0.8 | -1.0    |
| $\mu_b$           | 1.1         | 1.3  | 1.2     | $\mu_b$           | -1.2        | -1.2 | -1.2    |
| $\mu_c$           | 0.9         | 0.9  | 0.9     | $\mu_c$           | -1.9        | -1.9 | -1.9    |
| $\Delta E$        | 1159        | 1193 | 1158    | $\Delta E$        | 330         | 920  | 584     |
| $\Delta E_{ZPE}$  | 965         | 1010 | 976     | $\Delta E_{ZPE}$  | 417         | 899  | 639     |
| $\Delta G_{298K}$ | 985         | 951  | 968     | $\Delta G_{298K}$ | 778         | 1057 | 933     |
| G+TG+/G-G+/cc     | B3LYP-GD3BJ | MP2  | B2PLYPD | G+G+T/G+G+/cc     | B3LYP-GD3BJ | MP2  | B2PLYPD |
| A                 | 1419        | 1433 | 1425    | A                 | 1492        | 1499 | 1494    |
| B                 | 615         | 623  | 618     | B                 | 549         | 558  | 553     |
| C                 | 530         | 532  | 530     | C                 | 501         | 508  | 503     |
| $\mu_a$           | -2.3        | 2.4  | 2.4     | $\mu_a$           | 0.9         | -0.8 | -0.9    |
| $\mu_b$           | 3.0         | -3.1 | -3.0    | $\mu_b$           | -0.4        | 0.5  | 0.4     |
| $\mu_c$           | -0.8        | -0.7 | -0.8    | $\mu_c$           | 0.5         | 0.5  | 0.5     |

| $\Delta E$        | 357         | 854  | 571     | $\Delta E$        | 686         | 848  | 760     |
|-------------------|-------------|------|---------|-------------------|-------------|------|---------|
| $\Delta E_{ZPE}$  | 448         | 853  | 639     | $\Delta E_{ZPE}$  | 658         | 809  | 736     |
| $\Delta G_{298K}$ | 844         | 1099 | 983     | $\Delta G_{298K}$ | 731         | 830  | 795     |
| G-TG-/G+T/cc      | B3LYP-GD3BJ | MP2  | B2PLYPD | G+TG-/G-G+/cc     | B3LYP-GD3BJ | MP2  | B2PLYPD |
| A                 | 1557        | 1583 | 1568    | A                 | 1389        | 1402 | 1395    |
| B                 | 533         | 536  | 534     | B                 | 623         | 630  | 625     |
| C                 | 502         | 508  | 504     | C                 | 515         | 521  | 517     |
| $\mu_a$           | -1.9        | -1.9 | 1.9     | $\mu_a$           | -0.3        | 0.4  | 0.4     |
| $\mu_b$           | 0.6         | 0.6  | -0.6    | $\mu_b$           | 1.5         | 1.4  | 1.4     |
| $\mu_c$           | -1.0        | -1.1 | -1.0    | $\mu_c$           | -0.1        | 0.0  | 0.0     |
| $\Delta E$        | 363         | 795  | 887     | $\Delta E$        | 758         | 1181 | 928     |
| $\Delta E_{ZPE}$  | 409         | 837  | 940     | $\Delta E_{ZPE}$  | 699         | 1083 | 866     |
| $\Delta G_{298K}$ | 666         | 1003 | 1165    | $\Delta G_{298K}$ | 904         | 1172 | 1036    |
| G+TG+/G+G-/c      | B3LYP-GD3BJ | MP2  | B2PLYPD | G-G+T/G+G-/c      | B3LYP-GD3BJ | MP2  | B2PLYPD |
| A                 | 1526        | 1535 | 1531    | A                 | 1240        | 1230 | 1236    |
| B                 | 547         | 553  | 549     | B                 | 690         | 707  | 696     |
| C                 | 497         | 502  | 499     | C                 | 523         | 537  | 528     |
| $\mu_a$           | -3.0        | -3.0 | -3.0    | $\mu_a$           | 2.1         | 2.0  | 2.1     |
| $\mu_b$           | -1.3        | 1.3  | 1.3     | $\mu_b$           | -0.9        | -1.0 | -1.0    |
| $\mu_c$           | -0.3        | 0.3  | 0.3     | $\mu_c$           | 1.7         | 1.8  | 1.7     |
| $\Delta E$        | 549         | 1073 | 756     | $\Delta E$        | 628         | 1003 | 765     |
| $\Delta E_{ZPE}$  | 592         | 1045 | 785     | $\Delta E_{ZPE}$  | 662         | 1043 | 815     |
| $\Delta G_{298K}$ | 852         | 1150 | 992     | $\Delta G_{298K}$ | 938         | 1181 | 1048    |
| G+TG+/G+G-/c      | B3LYP-GD3BJ | MP2  | B2PLYPD | TG+G-/TG+/cc      | B3LYP-GD3BJ | MP2  | B2PLYPD |
| A                 | 1531        | 1540 | 1537    | A                 | 1278        | 1286 | 1281    |
| B                 | 548         | 555  | 550     | B                 | 647         | 653  | 649     |
| C                 | 498         | 503  | 499     | C                 | 481         | 487  | 483     |
| $\mu_a$           | -3.5        | -3.5 | -3.5    | $\mu_a$           | 2.5         | 2.4  | 2.4     |
| $\mu_b$           | -1.9        | 1.9  | 1.9     | $\mu_b$           | -0.8        | -0.9 | -0.9    |
| $\mu_c$           | 1.3         | -1.4 | -1.3    | $\mu_c$           | -0.2        | -0.1 | -0.2    |
| $\Delta E$        | 610         | 1054 | 778     | $\Delta E$        | 597         | 1083 | 755     |
| $\Delta E_{ZPE}$  | 646         | 1041 | 810     | $\Delta E_{ZPE}$  | 657         | 1093 | 811     |
| $\Delta G_{298K}$ | 890         | 1140 | 1006    | $\Delta G_{298K}$ | 892         | 1192 | 1002    |
| G+TG+/G+G+/c      | B3LYP-GD3BJ | MP2  | B2PLYPD | G-TG-/G+G+/cc     | B3LYP-GD3BJ | MP2  | B2PLYPD |
| A                 | 1436        | 1452 | 1444    | A                 | 1386        | 1421 | 1400    |
| B                 | 616         | 624  | 619     | B                 | 605         | 606  | 605     |
| C                 | 521         | 525  | 522     | C                 | 584         | 592  | 587     |
| $\mu_a$           | -1.6        | 1.5  | 1.5     | $\mu_a$           | 0.0         | 0.0  | 0.0     |
| $\mu_b$           | -2.1        | 2.1  | 2.1     | $\mu_b$           | -0.2        | 0.4  | 0.3     |
| $\mu_c$           | 0.6         | 0.4  | 0.5     | $\mu_c$           | 0.0         | 0.0  | 0.0     |
| $\Delta E$        | 657         | 972  | 808     | $\Delta E$        | 536         | 1028 | 768     |
| $\Delta E_{ZPE}$  | 613         | 947  | 786     | $\Delta E_{ZPE}$  | 574         | 1039 | 803     |

| $\Delta G_{298K}$ | 829         | 1134 | 1015    | $\Delta G_{298K}$ | 848         | 1220 | 1045    |
|-------------------|-------------|------|---------|-------------------|-------------|------|---------|
| G-TG-/G+T/cc      | B3LYP-GD3BJ | MP2  | B2PLYPD | G-TG-/G+G-/cc     | B3LYP-GD3BJ | MP2  | B2PLYPD |
| A                 | 1747        | 1740 | 1747    | A                 | 1397        | 1390 | 1396    |
| B                 | 510         | 515  | 512     | B                 | 591         | 606  | 596     |
| C                 | 485         | 493  | 487     | C                 | 567         | 575  | 570     |
| $\mu_a$           | -1.0        | -1.0 | -1.0    | $\mu_a$           | 2.1         | -2.1 | -2.1    |
| $\mu_b$           | 0.4         | 0.4  | 0.4     | $\mu_b$           | -1.3        | 1.4  | 1.4     |
| $\mu_c$           | -1.2        | -1.2 | -1.3    | $\mu_c$           | -2.1        | -2.1 | -2.1    |
| $\Delta E$        | 292         | 987  | 605     | $\Delta E$        | 449         | 963  | 680     |
| $\Delta E_{ZPE}$  | 461         | 1073 | 760     | $\Delta E_{ZPE}$  | 590         | 1021 | 805     |
| $\Delta G_{298K}$ | 806         | 1266 | 1053    | $\Delta G_{298K}$ | 908         | 1206 | 1078    |
| G-TG-/G+G-/cc'    | B3LYP-GD3BJ | MP2  | B2PLYPD | G-G-G-/TG+/c      | B3LYP-GD3BJ | MP2  | B2PLYPD |
| A                 | 1394        | 1388 | 1394    | A                 | 1206        | 1236 | 1214    |
| B                 | 586         | 601  | 591     | B                 | 700         | 696  | 699     |
| C                 | 563         | 572  | 566     | C                 | 656         | 650  | 655     |
| $\mu_a$           | 1.7         | -1.8 | -1.8    | $\mu_a$           | -2.2        | -1.8 | -2.1    |
| $\mu_b$           | -1.4        | 1.4  | 1.4     | $\mu_b$           | -1.1        | 1.1  | 1.1     |
| $\mu_c$           | -0.1        | -0.2 | -0.1    | $\mu_c$           | 2.0         | -2.2 | -2.0    |
| $\Delta E$        | 533         | 1159 | 812     | $\Delta E$        | 424         | 1304 | 821     |
| $\Delta E_{ZPE}$  | 677         | 1204 | 933     | $\Delta E_{ZPE}$  | 629         | 1383 | 991     |
| $\Delta G_{298K}$ | 980         | 1367 | 1188    | $\Delta G_{298K}$ | 1098        | 1581 | 1373    |

**Table S02.** Cartesian coordinates in Angstroms (Å) of detected conformers f mannitol at B2PLYP-GD3BJ/6-311++G (d,p) level of theory.

| TG+T/G+T/c |        |        |        | TG+T/G+G+/c |        |        |        | TG-T/TT/c |        |        |        |
|------------|--------|--------|--------|-------------|--------|--------|--------|-----------|--------|--------|--------|
| Atom       | X      | Y      | Z      | Atom        | X      | Y      | Z      | Atom      | X      | Y      | Z      |
| C          | -1.496 | -0.612 | 0.482  | C           | 1.626  | -0.131 | -0.240 | C         | 1.509  | -0.031 | -0.231 |
| C          | -0.761 | 0.583  | -0.162 | C           | 0.594  | 0.856  | 0.295  | C         | 0.713  | 0.295  | 1.035  |
| C          | 0.742  | 0.637  | 0.126  | C           | -0.849 | 0.580  | -0.146 | C         | -0.713 | -0.294 | 1.035  |
| C          | 1.552  | -0.478 | -0.548 | C           | -1.492 | -0.681 | 0.474  | C         | -1.509 | 0.031  | -0.231 |
| C          | 3.045  | -0.181 | -0.557 | C           | -3.005 | -0.558 | 0.546  | C         | -2.964 | -0.377 | -0.103 |
| O          | 3.537  | -0.059 | 0.780  | O           | -3.560 | -0.126 | -0.700 | O         | -3.602 | 0.073  | -1.307 |
| O          | 1.316  | -1.728 | 0.113  | O           | -1.219 | -1.822 | -0.334 | O         | -1.423 | 1.444  | -0.458 |
| O          | 1.275  | 1.872  | -0.342 | O           | -1.561 | 1.771  | 0.217  | O         | -0.707 | -1.699 | 1.252  |
| O          | -1.268 | 1.834  | 0.323  | O           | 1.000  | 2.131  | -0.189 | O         | 0.707  | 1.699  | 1.252  |
| O          | -1.383 | -1.767 | -0.341 | O           | 1.383  | -1.417 | 0.341  | O         | 1.423  | -1.444 | -0.458 |
| C          | -2.983 | -0.330 | 0.640  | C           | 3.041  | 0.307  | 0.101  | C         | 2.964  | 0.377  | -0.103 |
| O          | -3.556 | 0.191  | -0.561 | O           | 3.883  | -0.787 | -0.292 | O         | 3.602  | -0.073 | -1.307 |
| H          | -1.084 | -0.808 | 1.480  | H           | 1.531  | -0.196 | -1.331 | H         | 1.072  | 0.503  | -1.083 |
| H          | -0.910 | 0.524  | -1.246 | H           | 0.629  | 0.840  | 1.394  | H         | 1.226  | -0.150 | 1.892  |
| H          | 0.883  | 0.563  | 1.214  | H           | -0.866 | 0.463  | -1.235 | H         | -1.226 | 0.150  | 1.892  |
| H          | 1.211  | -0.609 | -1.578 | H           | -1.113 | -0.834 | 1.492  | H         | -1.072 | -0.503 | -1.083 |
| H          | 3.566  | -1.030 | -1.000 | H           | -3.419 | -1.526 | 0.843  | H         | -3.038 | -1.461 | 0.009  |
| H          | 3.250  | 0.716  | -1.141 | H           | -3.293 | 0.191  | 1.282  | H         | -3.404 | 0.116  | 0.771  |
| H          | 3.362  | 0.842  | 1.070  | H           | -3.326 | -0.789 | -1.357 | H         | -4.550 | -0.049 | -1.222 |
| H          | 1.865  | -1.733 | 0.908  | H           | -0.272 | -2.006 | -0.232 | H         | -2.096 | 1.663  | -1.113 |
| H          | 0.597  | 2.535  | -0.151 | H           | -2.399 | 1.745  | -0.260 | H         | -0.050 | -2.067 | 0.646  |
| H          | -2.134 | 1.958  | -0.083 | H           | 0.223  | 2.698  | -0.101 | H         | 0.050  | 2.068  | 0.645  |
| H          | -0.479 | -2.100 | -0.235 | H           | 2.202  | -1.917 | 0.224  | H         | 2.096  | -1.663 | -1.113 |
| H          | -3.481 | -1.255 | 0.943  | H           | 3.291  | 1.220  | -0.441 | H         | 3.038  | 1.461  | 0.009  |
| H          | -3.148 | 0.425  | 1.406  | H           | 3.119  | 0.484  | 1.180  | H         | 3.404  | -0.116 | 0.771  |
| H          | -3.456 | -0.483 | -1.242 | H           | 4.778  | -0.619 | 0.014  | H         | 4.550  | 0.049  | -1.222 |

Figure S02. 50 lowest-energy structures of mannitol.

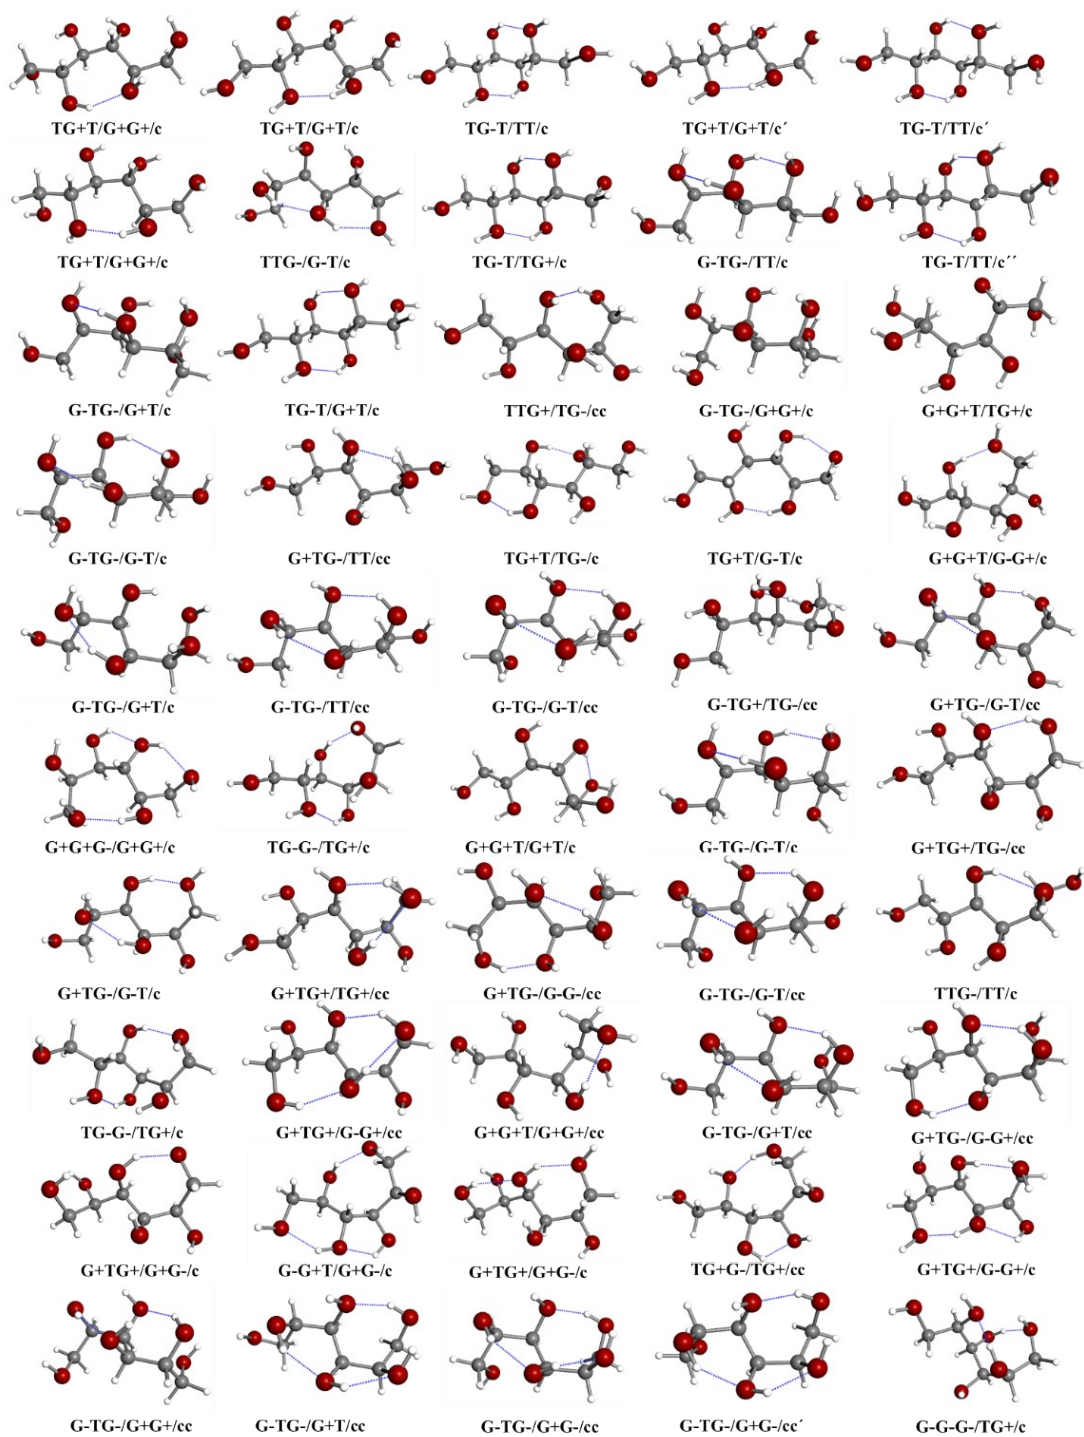

**Figure S03.** Summary of reaction network of fragment species of mannitol predicted by Automekin. Blue arrows represent barrierless processes, while black arrows indicate reactions with an energetic barrier.

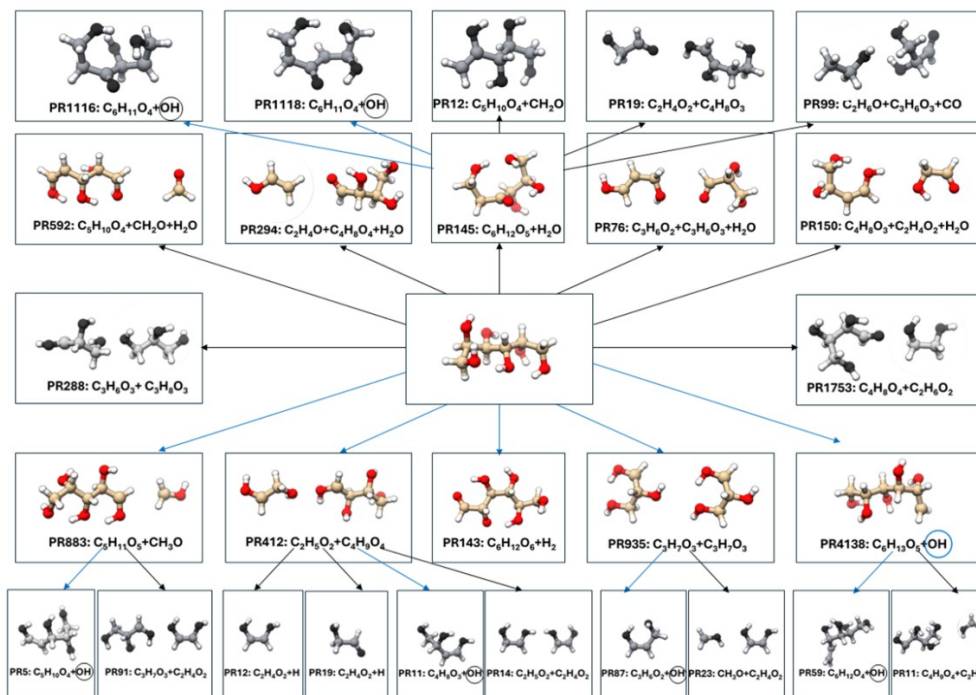

**Table S03.** Summary of known molecular species detected in the broadband spectrum of laser ablated mannitol.

| Name                             | Formula                                      | $N^a$ |
|----------------------------------|----------------------------------------------|-------|
| Formaldehyde                     | COH <sub>2</sub>                             | 1     |
| Hydroxy Radical                  | OH                                           | 2     |
| Acetic Acid                      | C <sub>2</sub> O <sub>2</sub> H <sub>4</sub> | 4     |
| Ethylene glycol (aGg' conformer) | C <sub>2</sub> O <sub>2</sub> H <sub>6</sub> | 5     |
| Glycolic Acid                    | C <sub>2</sub> O <sub>3</sub> H <sub>4</sub> | 2     |
| Syn-vinyl alcohol                | C <sub>2</sub> OH <sub>4</sub>               | 1     |
| Anti-vinyl alcohol               | C <sub>2</sub> OH <sub>4</sub>               | 1     |
| Acetaldehyde                     | C <sub>2</sub> OH <sub>4</sub>               | 7     |
| Ethanol                          | C <sub>2</sub> OH <sub>6</sub>               | 1     |
| Oxopropadienylidene              | C <sub>3</sub> O                             | 1     |
| Malonaldehyde                    | C <sub>3</sub> O <sub>2</sub> H <sub>4</sub> | 2     |
| 2-Hydroxypropenal                | C <sub>3</sub> O <sub>2</sub> H <sub>4</sub> | 5     |
| 2-Hydroxypropanal                | C <sub>3</sub> O <sub>2</sub> H <sub>6</sub> | 3     |
| 3-Hydroxypropanal                | C <sub>3</sub> O <sub>2</sub> H <sub>6</sub> | 3     |
| Glyceraldehyde (E conformers)    | C <sub>3</sub> O <sub>3</sub> H <sub>5</sub> | 9     |
| Glycolaldehyde                   | C <sub>3</sub> O <sub>3</sub> H <sub>6</sub> | 2     |
| Glycerol (G'Gg'gg' conformer)    | C <sub>3</sub> O <sub>3</sub> H <sub>8</sub> | 2     |
| Glycerol (GGag'g' conformer)     | C <sub>3</sub> O <sub>3</sub> H <sub>8</sub> | 4     |
| Propynal                         | C <sub>3</sub> OH <sub>2</sub>               | 1     |
| Trans-propenal/ Acrolein         | C <sub>3</sub> OH <sub>4</sub>               | 1     |
| Syn-Propanal                     | C <sub>3</sub> OH <sub>6</sub>               | 4     |
| 1-Butyne                         | C <sub>4</sub> H <sub>5</sub>                | 1     |
| 1,3-Pentadiyne                   | C <sub>5</sub> H <sub>4</sub>                | 2     |

<sup>a</sup> $N$  represents the number of observed rotational transitions. <sup>b</sup>Species assigned with a single detected transition are classified as tentative. However, their assignment is robustly supported as the observed lines correspond to their most intense expected transitions under jet-cooled conditions, they are predicted as photofragments by AutoMeKin, and they are commonly observed ablation products in related molecules.

**Table S04.** Measured rotational transitions of Rotamer I (TG+T/G+G+/c).

| J' | K' <sub>a</sub> | K' <sub>c</sub> | J'' | K'' <sub>a</sub> | K'' <sub>c</sub> | V <sub>obs</sub> | V <sub>obs</sub> -V <sub>cal</sub> |
|----|-----------------|-----------------|-----|------------------|------------------|------------------|------------------------------------|
| 3  | 2               | 1               | 2   | 2                | 0                | 2843.245         | -0.002                             |
| 4  | 0               | 4               | 3   | 0                | 3                | 3699.351         | -0.011                             |
| 4  | 2               | 2               | 3   | 2                | 1                | 3813.510         | 0.034                              |
| 4  | 1               | 3               | 3   | 1                | 2                | 3942.986         | 0.002                              |
| 5  | 1               | 5               | 4   | 1                | 4                | 4427.928         | 0.031                              |
| 5  | 0               | 5               | 4   | 0                | 4                | 4583.369         | 0.012                              |
| 5  | 2               | 4               | 4   | 2                | 3                | 4684.998         | 0.013                              |
| 5  | 2               | 3               | 4   | 2                | 2                | 4800.063         | 0.010                              |
| 6  | 1               | 6               | 5   | 1                | 5                | 5300.138         | 0.014                              |
| 6  | 0               | 6               | 5   | 0                | 5                | 5447.027         | 0.018                              |
| 6  | 2               | 5               | 5   | 2                | 4                | 5610.922         | 0.014                              |
| 6  | 3               | 4               | 5   | 3                | 3                | 5665.415         | 0.014                              |
| 6  | 3               | 3               | 5   | 3                | 2                | 5678.317         | -0.005                             |
| 6  | 2               | 4               | 5   | 2                | 3                | 5801.828         | 0.016                              |
| 6  | 1               | 5               | 5   | 1                | 4                | 5878.457         | 0.015                              |
| 7  | 1               | 7               | 6   | 1                | 6                | 6166.833         | 0.014                              |
| 7  | 1               | 7               | 6   | 1                | 6                | 6166.835         | 0.016                              |
| 3  | 2               | 1               | 2   | 1                | 1                | 6292.131         | 0.037                              |
| 7  | 0               | 7               | 6   | 0                | 6                | 6294.113         | 0.012                              |
| 7  | 2               | 6               | 6   | 2                | 5                | 6530.938         | 0.015                              |
| 3  | 2               | 2               | 2   | 1                | 2                | 6557.484         | 0.002                              |
| 7  | 6               | 1               | 6   | 6                | 0                | 6594.944         | 0.019                              |
| 7  | 6               | 2               | 6   | 6                | 1                | 6594.944         | 0.019                              |
| 7  | 5               | 3               | 6   | 5                | 2                | 6599.508         | 0.019                              |
| 7  | 5               | 2               | 6   | 5                | 1                | 6599.508         | 0.019                              |
| 7  | 4               | 4               | 6   | 4                | 3                | 6607.811         | 0.021                              |
| 7  | 4               | 3               | 6   | 4                | 2                | 6608.714         | 0.029                              |
| 7  | 3               | 5               | 6   | 3                | 4                | 6614.766         | 0.014                              |
| 7  | 3               | 4               | 6   | 3                | 3                | 6643.371         | 0.014                              |
| 5  | 1               | 4               | 4   | 0                | 4                | 6678.142         | 0.023                              |
| 7  | 2               | 5               | 6   | 2                | 4                | 6813.824         | 0.019                              |
| 7  | 1               | 6               | 6   | 1                | 5                | 6827.997         | 0.014                              |
| 8  | 1               | 8               | 7   | 1                | 7                | 7028.270         | 0.015                              |
| 8  | 0               | 8               | 7   | 0                | 7                | 7130.652         | 0.009                              |
| 4  | 2               | 2               | 3   | 1                | 2                | 7142.605         | 0.015                              |
| 8  | 2               | 7               | 7   | 2                | 6                | 7444.233         | 0.010                              |
| 8  | 7               | 1               | 7   | 7                | 0                | 7536.523         | 0.007                              |
| 8  | 7               | 2               | 7   | 7                | 1                | 7536.523         | 0.007                              |
| 8  | 6               | 3               | 7   | 6                | 2                | 7540.555         | 0.017                              |
| 8  | 6               | 2               | 7   | 6                | 1                | 7540.555         | 0.017                              |

|    |   |    |    |   |    |          |        |
|----|---|----|----|---|----|----------|--------|
| 8  | 5 | 4  | 7  | 5 | 3  | 7547.373 | 0.011  |
| 8  | 5 | 3  | 7  | 5 | 2  | 7547.373 | 0.011  |
| 8  | 4 | 5  | 7  | 4 | 4  | 7559.286 | 0.015  |
| 8  | 4 | 4  | 7  | 4 | 3  | 7561.728 | 0.016  |
| 8  | 3 | 6  | 7  | 3 | 5  | 7564.051 | 0.015  |
| 8  | 3 | 5  | 7  | 3 | 4  | 7619.816 | 0.016  |
| 4  | 2 | 3  | 3  | 1 | 3  | 7643.952 | 0.006  |
| 8  | 1 | 7  | 7  | 1 | 6  | 7760.775 | 0.010  |
| 8  | 2 | 6  | 7  | 2 | 5  | 7828.720 | 0.006  |
| 9  | 1 | 9  | 8  | 1 | 8  | 7884.990 | 0.015  |
| 9  | 0 | 9  | 8  | 0 | 8  | 7962.474 | 0.009  |
| 6  | 1 | 5  | 5  | 0 | 5  | 7973.226 | 0.022  |
| 5  | 2 | 3  | 4  | 1 | 3  | 7999.664 | 0.004  |
| 9  | 2 | 8  | 8  | 2 | 7  | 8350.165 | 0.005  |
| 9  | 7 | 2  | 8  | 7 | 1  | 8481.837 | 0.021  |
| 9  | 7 | 3  | 8  | 7 | 2  | 8481.837 | 0.021  |
| 9  | 6 | 4  | 8  | 6 | 3  | 8487.564 | 0.013  |
| 9  | 6 | 3  | 8  | 6 | 2  | 8487.564 | 0.013  |
| 9  | 5 | 5  | 8  | 5 | 4  | 8497.274 | -0.016 |
| 9  | 5 | 4  | 8  | 5 | 3  | 8497.274 | -0.016 |
| 9  | 3 | 7  | 8  | 3 | 6  | 8511.954 | -0.003 |
| 9  | 4 | 6  | 8  | 4 | 5  | 8513.245 | 0.007  |
| 9  | 4 | 5  | 8  | 4 | 4  | 8519.057 | 0.023  |
| 9  | 3 | 6  | 8  | 3 | 5  | 8610.311 | 0.003  |
| 9  | 1 | 8  | 8  | 1 | 7  | 8673.336 | 0.004  |
| 10 | 1 | 10 | 9  | 1 | 9  | 8737.696 | 0.005  |
| 5  | 2 | 4  | 4  | 1 | 4  | 8778.669 | -0.035 |
| 10 | 0 | 10 | 9  | 0 | 9  | 8793.590 | -0.003 |
| 3  | 3 | 0  | 2  | 2 | 0  | 8801.232 | -0.006 |
| 3  | 3 | 1  | 2  | 2 | 1  | 8807.063 | -0.017 |
| 9  | 2 | 7  | 8  | 2 | 6  | 8839.176 | 0.005  |
| 6  | 2 | 4  | 5  | 1 | 4  | 8885.759 | -0.007 |
| 10 | 2 | 9  | 9  | 2 | 8  | 9248.296 | 0.005  |
| 10 | 7 | 4  | 9  | 7 | 3  | 9428.266 | 0.005  |
| 10 | 7 | 3  | 9  | 7 | 2  | 9428.266 | 0.005  |
| 10 | 6 | 5  | 9  | 6 | 4  | 9436.142 | 0.003  |
| 10 | 6 | 4  | 9  | 6 | 3  | 9436.142 | 0.003  |
| 10 | 5 | 6  | 9  | 5 | 5  | 9449.340 | 0.003  |
| 10 | 5 | 5  | 9  | 5 | 4  | 9449.767 | 0.002  |
| 10 | 3 | 8  | 9  | 3 | 7  | 9457.061 | -0.002 |
| 10 | 4 | 7  | 9  | 4 | 6  | 9469.520 | -0.003 |
| 10 | 4 | 6  | 9  | 4 | 5  | 9481.890 | 0.000  |
| 10 | 1 | 9  | 9  | 1 | 8  | 9563.222 | -0.005 |
| 11 | 1 | 11 | 10 | 1 | 10 | 9587.161 | -0.007 |
| 10 | 3 | 7  | 9  | 3 | 6  | 9616.493 | -0.008 |
| 11 | 0 | 11 | 10 | 0 | 10 | 9626.048 | 0.008  |

|    |   |    |    |   |    |           |        |
|----|---|----|----|---|----|-----------|--------|
| 4  | 3 | 1  | 3  | 2 | 1  | 9729.665  | 0.001  |
| 4  | 3 | 2  | 3  | 2 | 2  | 9758.256  | -0.001 |
| 10 | 2 | 8  | 9  | 2 | 7  | 9839.284  | -0.010 |
| 6  | 2 | 5  | 5  | 1 | 5  | 9961.715  | 0.000  |
| 11 | 2 | 10 | 10 | 2 | 9  | 10138.412 | -0.012 |
| 11 | 8 | 3  | 10 | 8 | 2  | 10369.286 | 0.017  |
| 11 | 8 | 4  | 10 | 8 | 3  | 10369.286 | 0.017  |
| 11 | 7 | 5  | 10 | 7 | 4  | 10376.002 | 0.019  |
| 11 | 7 | 4  | 10 | 7 | 3  | 10376.002 | 0.019  |
| 11 | 6 | 6  | 10 | 6 | 5  | 10386.479 | -0.013 |
| 11 | 6 | 5  | 10 | 6 | 4  | 10386.479 | -0.013 |
| 11 | 3 | 9  | 10 | 3 | 8  | 10397.858 | -0.022 |
| 11 | 5 | 7  | 10 | 5 | 6  | 10403.896 | -0.011 |
| 11 | 5 | 6  | 10 | 5 | 5  | 10404.956 | -0.014 |
| 11 | 4 | 8  | 10 | 4 | 7  | 10427.668 | -0.030 |
| 11 | 1 | 10 | 10 | 1 | 9  | 10430.152 | -0.021 |
| 12 | 1 | 12 | 11 | 1 | 11 | 10434.132 | -0.009 |
| 11 | 4 | 7  | 10 | 4 | 6  | 10451.900 | -0.010 |
| 12 | 0 | 12 | 11 | 0 | 11 | 10460.416 | -0.006 |
| 11 | 3 | 8  | 10 | 3 | 7  | 10637.740 | -0.016 |
| 5  | 3 | 3  | 4  | 2 | 3  | 10721.221 | 0.006  |
| 11 | 2 | 9  | 10 | 2 | 8  | 10824.773 | -0.039 |
| 12 | 2 | 11 | 11 | 2 | 10 | 11020.652 | 0.002  |
| 12 | 1 | 11 | 11 | 1 | 10 | 11276.875 | -0.018 |
| 13 | 1 | 13 | 12 | 1 | 12 | 11279.235 | -0.017 |
| 13 | 0 | 13 | 12 | 0 | 12 | 11296.612 | -0.026 |
| 12 | 3 | 10 | 11 | 3 | 9  | 11332.980 | -0.035 |
| 12 | 5 | 8  | 11 | 5 | 7  | 11361.042 | -0.026 |
| 12 | 5 | 7  | 11 | 5 | 6  | 11363.479 | 0.009  |
| 12 | 4 | 9  | 11 | 4 | 8  | 11387.022 | -0.028 |
| 12 | 4 | 8  | 11 | 4 | 7  | 11431.130 | -0.024 |
| 12 | 2 | 10 | 11 | 2 | 9  | 11792.368 | -0.048 |

---

**Table S05.** Measured rotational transitions of Rotamer II (TG+T/G+T/c).

| J' | K' <sub>a</sub> | K' <sub>c</sub> | J'' | K'' <sub>a</sub> | K'' <sub>c</sub> | V <sub>obs</sub> | V <sub>obs</sub> -V <sub>cal</sub> |
|----|-----------------|-----------------|-----|------------------|------------------|------------------|------------------------------------|
| 3  | 2               | 1               | 2   | 1                | 1                | 6387.635         | 0.016                              |
| 3  | 2               | 1               | 2   | 1                | 2                | 6668.402         | 0.029                              |
| 7  | 1               | 7               | 6   | 0                | 6                | 7010.973         | 0.005                              |
| 4  | 2               | 3               | 3   | 1                | 2                | 7206.527         | -0.008                             |
| 4  | 2               | 2               | 3   | 1                | 2                | 7288.733         | 0.014                              |
| 8  | 1               | 8               | 7   | 0                | 7                | 7799.109         | 0.002                              |
| 5  | 2               | 4               | 4   | 1                | 3                | 8006.491         | -0.017                             |
| 3  | 3               | 1               | 2   | 2                | 0                | 8856.184         | -0.011                             |
| 3  | 3               | 0               | 2   | 2                | 0                | 8856.401         | 0.000                              |
| 3  | 3               | 0               | 2   | 2                | 1                | 8861.955         | -0.011                             |
| 11 | 1               | 10              | 10  | 2                | 9                | 9573.531         | -0.006                             |
| 4  | 3               | 2               | 3   | 2                | 1                | 9832.342         | 0.013                              |
| 4  | 3               | 1               | 3   | 2                | 1                | 9833.777         | 0.000                              |
| 4  | 3               | 2               | 3   | 2                | 2                | 9859.997         | -0.025                             |
| 4  | 3               | 1               | 3   | 2                | 2                | 9861.462         | -0.008                             |
| 5  | 3               | 2               | 4   | 2                | 3                | 10874.911        | 0.018                              |

**Table S06.** Measured rotational transitions of Rotamer III (TG-T/TT/c).

| J' | K' <sub>a</sub> | K' <sub>c</sub> | J'' | K'' <sub>a</sub> | K'' <sub>c</sub> | V <sub>obs</sub> | V <sub>obs</sub> -V <sub>cal</sub> |
|----|-----------------|-----------------|-----|------------------|------------------|------------------|------------------------------------|
| 4  | 2               | 2               | 3   | 1                | 2                | 6860.239         | -0.010                             |
| 4  | 2               | 3               | 3   | 1                | 3                | 6937.656         | 0.011                              |
| 6  | 1               | 5               | 5   | 0                | 5                | 6954.435         | -0.011                             |
| 5  | 2               | 3               | 4   | 1                | 3                | 7803.595         | 0.004                              |
| 5  | 2               | 4               | 4   | 1                | 4                | 7931.313         | 0.029                              |
| 3  | 3               | 0               | 2   | 2                | 0                | 7950.197         | 0.008                              |
| 3  | 3               | 1               | 2   | 2                | 1                | 7950.197         | 0.008                              |
| 7  | 1               | 6               | 6   | 0                | 6                | 7970.718         | -0.012                             |
| 4  | 3               | 1               | 3   | 2                | 1                | 8917.100         | 0.010                              |
| 4  | 3               | 2               | 3   | 2                | 2                | 8917.734         | 0.000                              |
| 6  | 2               | 5               | 5   | 1                | 5                | 8931.539         | -0.002                             |
| 7  | 2               | 5               | 6   | 1                | 5                | 9677.097         | -0.016                             |
| 5  | 3               | 2               | 4   | 2                | 2                | 9883.552         | -0.019                             |
| 5  | 3               | 3               | 4   | 2                | 3                | 9885.500         | 0.004                              |
| 6  | 3               | 3               | 5   | 2                | 3                | 10849.256        | 0.032                              |
| 6  | 3               | 4               | 5   | 2                | 4                | 10853.711        | 0.012                              |
| 4  | 4               | 0               | 3   | 3                | 0                | 10936.780        | -0.037                             |
| 4  | 4               | 1               | 3   | 3                | 1                | 10936.780        | -0.037                             |

**Figure S04.** Comparison of gas phases conformations and crystal phase structure.

**Gas Phase**

**TG+T/G+G+/c**

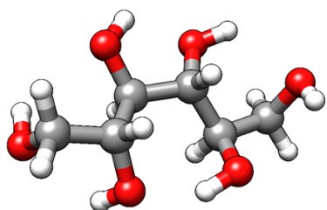

**TG+T/G+T/c**

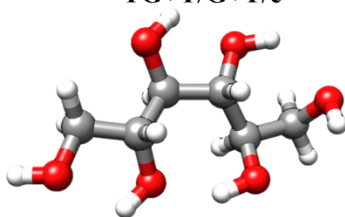

**TG-T/TT/c**

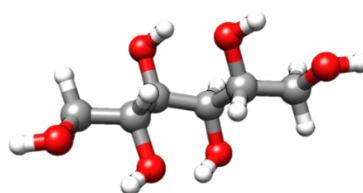

**Crystal Phase**

*TTT/G+G+/c*

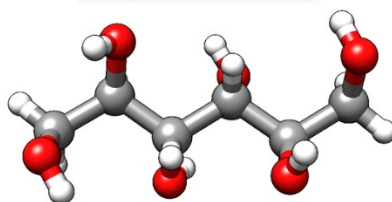

Supplement: d6cp00606j1.pdf [file d6cp00606j1.pdf]
